# Supplementary material for: A human homologue of monkey F5c
Source: PubMed Central journal article supplement — Neuroimage. 2015 May 1;111:251–66. doi: 10.1016/j.neuroimage.2015.02.033 (PMC4401441; doi:10.1016/j.neuroimage.2015.02.033), 2015-05-01

## Ferri et al Supplementary Information

Figure S1: Measurements of hand and head sizes in old (A, B) and new stimuli (C, D): red lines indicate horizontal size; old stimuli acting person (B): head  $3.3^\circ$ , hand  $1.7^\circ$ ; grasping hand (A):  $5.1^\circ$  new stimuli acting person (D): head  $2.1^\circ$ , hand  $1.1^\circ$ ; grasping hand (C):  $3.95^\circ$ . Thus all sizes were reduced in the new stimuli. However in relative terms, as fraction of the horizontal size of the frame, size increased in the new stimuli; old stimuli acting person: head 0.16, hand: 0.08; grasping hand: 0.3; new stimuli acting person: head 0.21, hand 0.11; grasping hand: 0.4.

Figure S2: Activity profile of the right PCSi site in experiment 1 analyzed with SPM 2. The site was 66 voxels in size with similar statistics: differences person acting vs static end ( $t=2.51$ ,  $p<0.02$ ), vs static mid ( $t=3.47$ ,  $p<0.005$ ) and scramble ( $t=5.4$ ,  $p<0.0001$ ); difference hand acting vs controls: all  $t<1.35$ ,  $p>0.02$ . Thus SPM2 and 8 yielded similar results in experiment 1, save for slight differences in size of activations.

Figure S3: Experiment S1: Activity profiles of 27 voxels centered on local maximum of the interaction for old stimuli (52, -4, 40, A) and new stimuli (52, -6, 42, B). Vertical bars=SE.

Figure S4: A, B: same data as in fig 4B, D and C: differential activity for observing foot (red), hand (green) and mouth (blue) actions plotted along the same miniROIs (from Jastorff et al 2010). Green arrow in A: Boundary between dorsal and ventral PM cortex according to Tomassini et al 2007, which matches earlier predictions by Rizzolatti and Luppino (2002) and recent results of Schubotz et al (2010) and green arrow: local maximum of the interaction between stereo and shape in Georgieva et al (2009), which most likely indicates F5a. In C: dots, stars and squares significant differences between curves as in Jastorff et al (2010).

---

Figure S5: Flatmap of left frontal cortex showing locations of the activation site by intelligible speech (white square, Joly et al 2012) and left phF5c in experiment 3 (yellow voxels) and in experiment 4 ( yellow dot with black outline, see fig 4C).

*Figure S1 Orban*

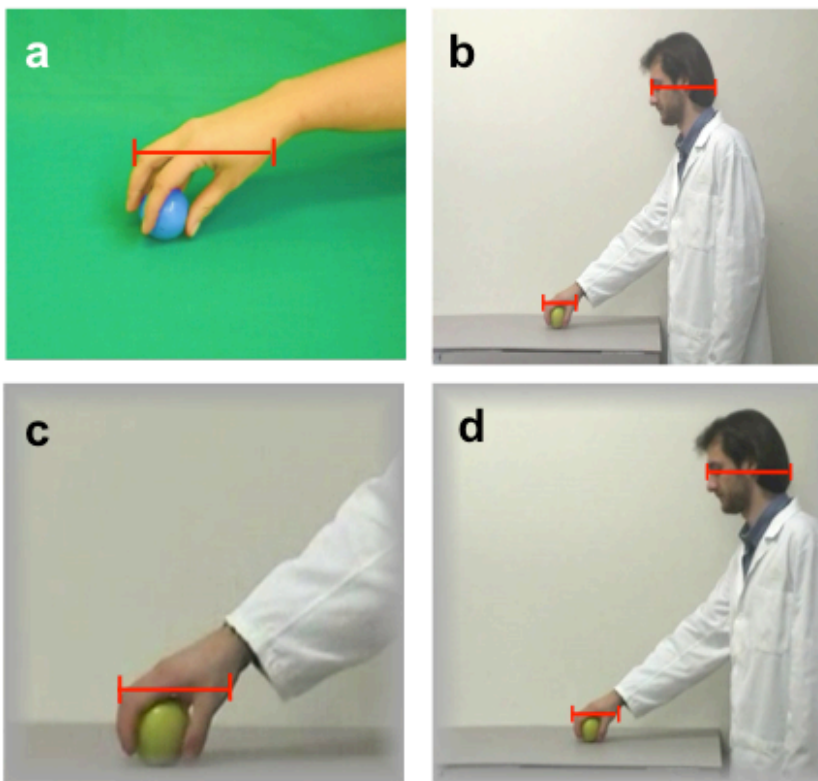

Figure S2 Orban

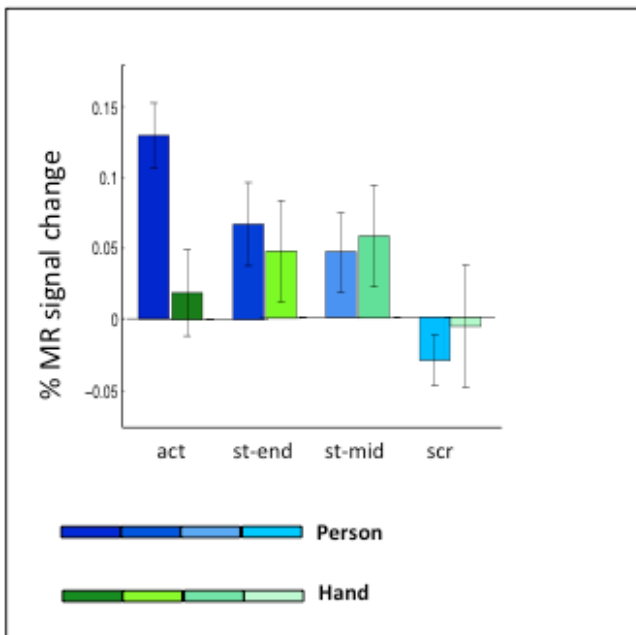

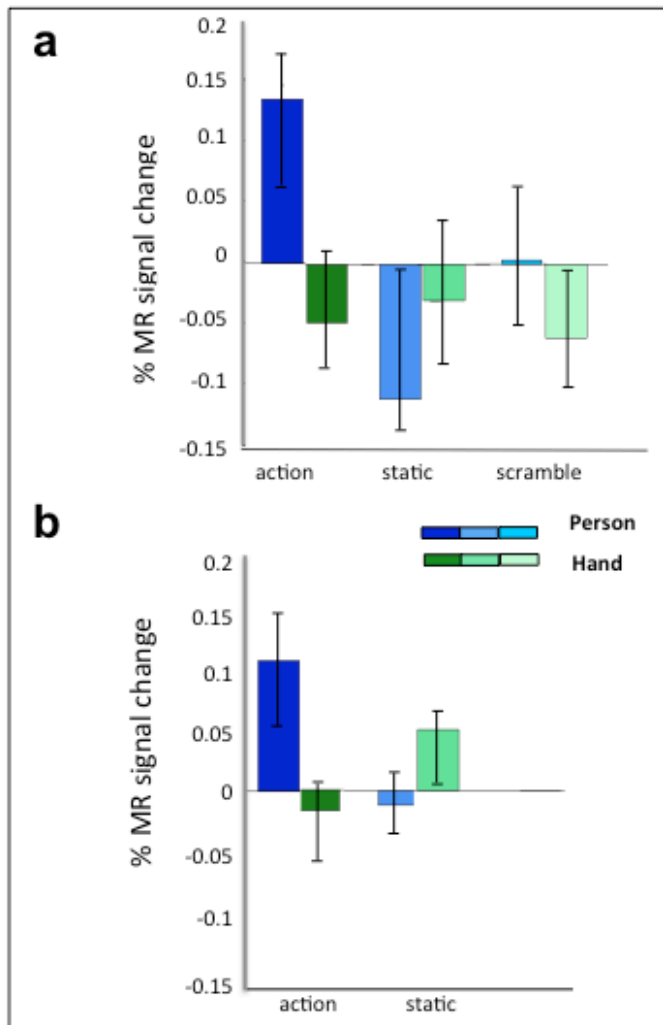

Figure S3 Orban

Figure S4 Orban

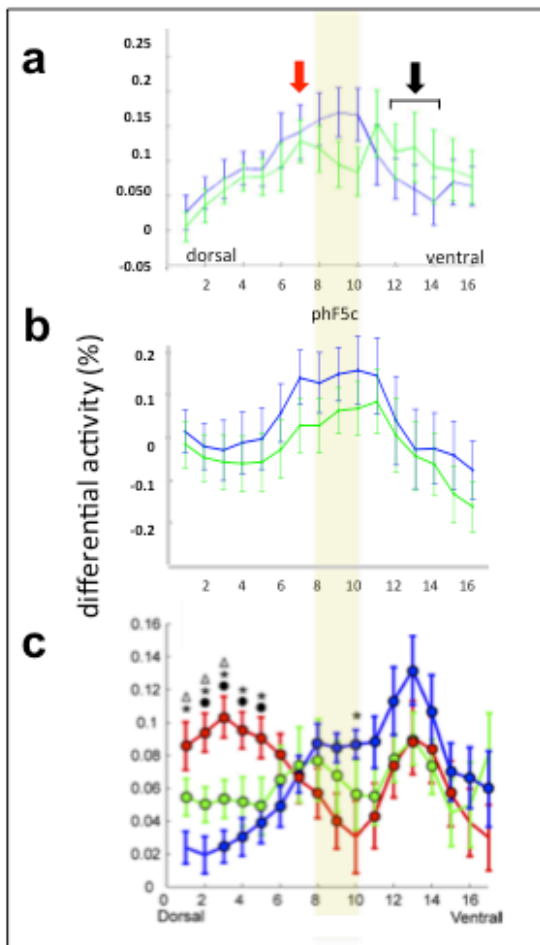

Figure S5 Orban

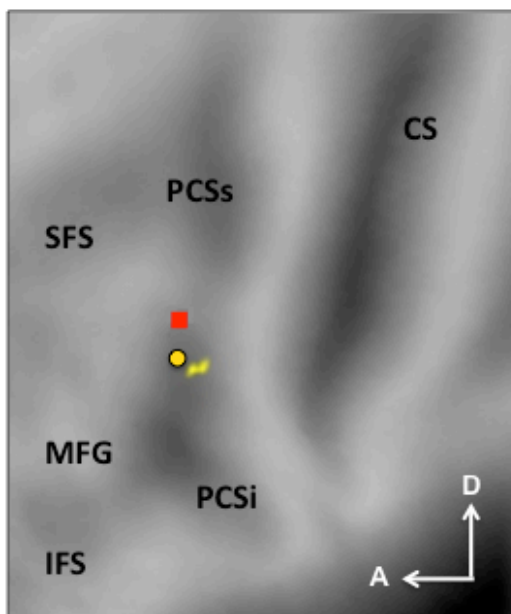

Supplement: mmc1.pdf [file mmc1.pdf]
